# Supplementary material for: Structure and metamorphism beneath the obducting Oman ophiolite: Evidence from the Bani Hamid granulites, northern Oman mountains
Source: Oxford University Press journal article supplement (doi:10.1130/ges01199.1), 2015-10-02
Supplement: 1199_suptab2.xlsx [file 1199_suptab2.xlsx]

## Sheet: Sheet1
Searle,, M.P., Waters, D.J., Garber, J.M., Rioux, M., Cherry, A.G., and Ambrose, T.K., 2015, Structure and metamorphism beneath the obducting Oman ophiolite: Evidence from the Bani Hamid granulites, northern Oman mountains: Geosphere, v. 11, doi:10.1130/GES01199.1.
Supplemental Table 2. Complete titanite U-Pb and trace element LASS data
Sample		Composition			Isotopic Ratiosa					Trace Elementsa
										calculated with NIST SRM 610 as primary RM
		Pb	U		238U/		207Pb/			Al		Si		P		Ti		V		Cr		Fe		Sr		Y		Zr		Nb		La		Ce		Pr		Nd		Sm		Eu		Gd		Tb		Dy
		ppm	ppm		206Pb	± 2 SE	206Pb	± 2 SE		ppm	± 2 SE	ppm	± 2 SE	ppm	± 2 SE	ppm	± 2 SE	ppm	± 2 SE	ppm	± 2 SE	ppm	± 2 SE	ppm	± 2 SE	ppm	± 2 SE	ppm	± 2 SE	ppm	± 2 SE	ppm	± 2 SE	ppm	± 2 SE	ppm	± 2 SE	ppm	± 2 SE	ppm	± 2 SE	ppm	± 2 SE	ppm	± 2 SE	ppm	± 2 SE	ppm	± 2 SE
JC98, marble
1		0.494	17.26		43.8404	1.55789	0.3634	0.0121208		13200	1600	130000	20000	150	26	248000	33000	347	30	30.1	6.6	10040	750	12.5	1.3	40.2	4.7	2000	220	1095	82	7.6	1.2	23.2	2.4	5.2	1.1	27.4	3.3	8.9	1.1	2.64	0.53	8.68	0.52	1.6	0.28	6.1	1.5
2		0.436	18.42		49.334	1.58564	0.308	0.011745		13200	1300	156000	19000	192	44	286000	27000	423	42	26.2	4.2	10500	1200	13.1	1.1	46.1	5.7	2160	160	1170	180	7.86	0.99	23.6	1.6	5.78	0.81	33	4.8	8.89	0.82	3.11	0.25	9.1	1.1	1.62	0.3	6.91	0.81
3		0.5166	13.68		40.3063	1.31564	0.4	0.0144222		16200	2500	142000	11000	160	21	289000	26000	389	23	32.6	3.7	9280	520	12.6	2.1	37.5	4.2	2120	230	1107	89	8.28	0.66	23.2	2.5	5.29	0.79	31.4	5	8.08	0.78	2.91	0.52	9.5	1.5	1.41	0.36	8.6	1.4
4		0.66	10.36		28.4091	1.33732	0.53	0.0183674		15900	2500	142000	19000	186	28	274000	8900	383	45	33.7	4.3	9800	1300	13.3	1.9	40.9	2.9	1930	150	951	69	8.1	1.1	21.6	1.3	5.84	0.43	31.1	3.6	7.6	0.96	1.96	0.47	7.22	0.98	1.3	0.33	8.1	1.6
5		0.3365	19.58		55.0055	1.89507	0.2412	0.0101233		14000	1900	149000	8700	158	17	263000	37000	395	39	31.3	7.4	10220	880	10.91	0.94	43.2	4.1	1960	180	970	100	7.7	0.92	25.1	2.9	5.79	0.82	29.4	1.7	10.6	1.9	2.49	0.4	9.5	2	1.73	0.21	8.5	1.3
6		0.3295	10.32		45.5789	2.02424	0.32	0.0181648		15000	1600	149000	12000	175	35	308000	24000	401	50	32.2	6.2	10200	1200	12.6	1.2	42.5	4.4	2270	190	1030	120	8.2	1.2	25.5	3.2	6.29	0.95	30.5	4.2	9.7	1.6	2.2	0.48	8.8	2.2	1.61	0.32	8.2	1.3
7		0.2649	11.84		58.2072	3.01227	0.205	0.0155502		14500	1400	141000	17000	149	41	284000	13000	417	34	25.2	3.6	9400	860	10.2	1	41.4	2.9	2332	63	987	83	8.7	1.2	24.9	3.8	6.01	0.92	26	2.4	9.8	2.4	2.88	0.62	9.1	2.2	1.58	0.27	8.92	0.81
8		0.531	14.09		38.506	1.65764	0.424	0.016368		14700	1200	146000	8500	165	20	311000	24000	426	35	28.6	6.5	9740	720	17	1.5	49.6	7.7	2120	160	980	42	8.8	1.1	23.7	1.9	5.99	0.79	30.3	5	9.1	2.1	3.21	0.65	7.47	0.63	1.58	0.31	10.9	2.1
9		0.2431	21.51		64.9351	2.23025	0.1352	0.0093017		16000	1600	149000	15000	182	33	275000	26000	368	28	34.9	4.9	11280	470	11	1.1	48.5	4.8	2080	110	766	57	8.6	1.2	26.6	2.9	6.6	0.76	33.3	3.3	10.9	2	2.77	0.56	10.5	2.7	1.56	0.33	9.3	1.4
10		0.612	14.91		36.9549	1.48129	0.448	0.0157887		14840	580	144000	17000	203	38	286000	36000	409	42	35.2	4.8	10100	1300	15	1.2	51.9	5.4	1930	190	1070	130	10.4	1.5	30.4	2.3	6.6	1.1	33.9	4.5	12.7	3.2	3.34	0.46	12	2.7	1.54	0.31	9.4	1.5
11		0.4808	29.04		55.2486	1.53698	0.218	0.00824679		13400	1200	152000	23000	194	53	294000	48000	454	67	34.7	3.3	11400	1600	12.6	1.7	60.1	5.6	2530	510	1390	230	12.7	2.2	33.6	4.5	8.26	0.68	46.2	8.6	15.3	2.9	3.43	0.35	10.19	0.99	2.43	0.64	12	2.1
12		0.2873	15.52		59.7372	2.14733	0.176	0.0115495		15400	1800	165000	16000	174	34	271000	16000	438	57	31.3	5.8	10490	940	10.75	0.82	45.6	6.2	2360	320	1390	180	8.12	0.48	22.7	1.3	5.77	0.73	27.8	4.9	10.9	2	2.66	0.63	10.5	2.2	1.56	0.34	8.8	1.2
13		0.504	13.03		39.2311	1.57858	0.384	0.0150991		15400	1700	158000	18000	158	39	300000	28000	420	34	30.7	5.5	10900	1000	12.5	1.4	49.7	5.4	2350	340	1040	120	8.41	0.26	24.9	2.8	6.27	0.76	31.5	4.4	11.7	2.3	2.73	0.32	10.6	2	1.42	0.18	7.6	1.4
14		0.3478	13.59		50.1253	2.11234	0.271	0.0122628		14300	1100	144000	18000	185	31	285000	32000	414	38	27.5	3.5	10300	1200	13.5	1.1	42.5	5.3	2160	160	1050	150	8.3	1.2	22.6	2.4	4.89	0.61	32	2.9	8.8	1.8	2.77	0.35	10.4	3.9	1.41	0.21	8.3	2.6
15		0.2348	12.89		58.8928	2.5129	0.2	0.0126491		13330	860	148000	7100	190	26	265000	23000	383	30	35.5	5.8	9500	1200	10.31	0.83	44	3	2020	120	968	54	6.75	0.2	22.5	2.8	5.41	0.47	28.6	2.7	8.6	2.6	2.68	0.52	8.92	0.61	1.48	0.18	10.3	1.9
16		0.4452	21.38		49.8505	1.65189	0.2802	0.00993201		14300	1300	141000	21000	169	22	282000	29000	390	35	31.6	5.9	11160	820	10.7	0.8	45.4	5.2	1750	140	890	150	8.3	0.82	24.5	2.2	5.59	0.6	30.9	5.3	11	1.8	3.07	0.65	8.8	3.1	1.88	0.46	10.2	2.2
17		0.2426	17.54		59.1716	2.17148	0.1378	0.0102765		13900	2100	145000	7600	172	30	263000	25000	360	30	34.9	6.1	10900	1000	12.07	0.69	42.3	5	1980	150	945	83	7.68	0.71	24.3	3	5.8	0.7	27.2	3.9	10	1.7	3.22	0.54	9.7	1	1.75	0.2	10.1	2
18		0.2706	14.34		56.1482	2.30913	0.171	0.0124778		15400	1400	154000	18000	197	25	296000	25000	449	53	34.9	4.5	10770	910	10.9	1.4	44.3	5	2220	280	1220	170	7.61	0.86	23.3	4.2	5.49	0.77	30	5.6	10.8	1.7	2.67	0.61	8.7	2.3	1.49	0.26	8.1	2.5
19		0.51	19.33		45.208	1.62388	0.318	0.0144724		13800	1100	159000	18000	209	35	279000	17000	435	29	40.4	4.9	11900	1100	12	1.4	50.6	2.7	2384	78	1460	100	8.2	1	25	1.6	5.81	0.36	31.2	3.2	10.6	2	3.14	0.36	10.6	3	1.5	0.21	10.2	2.5
20		0.397	20.45		52.4659	1.56131	0.271	0.0122628		16100	2200	150000	12000	182	41	293000	30000	404	43	34.5	6.7	11700	1000	11.19	0.56	44.7	4.5	2030	300	1063	77	8.3	1	25.9	2.3	5.79	0.97	32.1	5.3	8.5	1.9	2.89	0.47	8.5	1.4	1.86	0.29	9.3	2
21		0.5253	22.26		60.7533	1.85569	0.1751	0.00947122		15000	1200	151000	9700	180	19	278000	27000	385	41	34.9	6.5	11940	970	12.03	0.57	47.5	3.3	2490	210	810	64	13.7	2	37.5	2.1	8.6	1.3	45.1	4.9	12.5	1.8	3.37	0.73	12.4	1.4	2.09	0.27	11.4	1.5
22		0.251	22.4		61.6903	1.9892	0.1582	0.00823231		15100	1200	145000	15000	177	20	293000	13000	410	39	36.8	4	11170	640	12.4	1	46.3	2	2000	130	962	45	10.08	0.64	26.6	2	5.8	0.34	29.9	2	11.3	1.4	3.2	0.52	12.5	2.6	1.56	0.53	9.8	1.3
23		0.2608	20.03		61.2745	2.0872	0.1504	0.00986955		14100	1500	131000	15000	175	21	272000	25000	372	34	29.4	5	10800	1200	10.37	0.78	41.9	5.6	1980	210	1240	130	6.68	0.96	21.8	1.8	5.01	0.49	27.8	3.3	9.1	1.1	2.73	0.41	10.4	1.9	1.41	0.22	8.6	1.4
24		0.3494	18.58		54.3478	2.02887	0.2519	0.0108417		15500	2600	149000	14000	193	26	279000	43000	398	50	29.8	3.9	13010	640	11.4	1.5	46.1	5.5	2036	98	1204	85	8.4	1.2	25.7	2.5	5.69	0.69	31	2.6	8.6	1.7	2.58	0.52	10.9	1.6	1.57	0.23	9.6	1.3
25		0.611	16.6		37.2024	1.29973	0.4412	0.0126041		15000	1100	142000	5600	176	34	280000	13000	408	29	28.5	5	12200	1100	12.9	0.73	46.6	2.4	2073	81	1230	100	9.1	1.5	26.5	1.9	6.28	0.63	34	4.1	10.1	1.2	3.11	0.53	10.4	2.2	1.51	0.32	9.17	0.94
26		0.2883	21.04		58.2751	1.81578	0.1937	0.00791315		16600	1600	146000	18000	181	31	294000	42000	375	28	36.1	3.1	11900	1100	12.5	1.9	52.1	5.2	2100	180	960	110	8.1	1.4	24.6	3.6	6.4	1.2	31	3.1	9.1	1.9	3.69	0.62	10.3	3	1.64	0.43	10.7	1.7
27		0.2979	20.25		59.952	2.07157	0.1769	0.00793268		15900	3100	131000	14000	200	34	272000	38000	372	41	35.8	2.9	11400	1000	11	1.1	46.9	6.7	1930	160	1090	120	8.7	1.3	25.1	3.7	5.91	0.82	30.7	3	11.6	2.9	3.09	0.25	11.6	2.6	1.55	0.19	10.8	1.1
28		0.5341	22.42		62.0733	2.2919	0.1392	0.00856508		13700	990	145000	9600	174	23	279000	12000	359	25	31.4	2.8	12000	920	11.9	1.4	49.6	2.9	1343	68	709	62	11.8	1.5	34.9	3.1	9.1	0.98	50.8	5.6	12.8	2.5	3.29	0.66	14.6	2.7	1.76	0.38	10	1.6
29		0.1285	16.61		59.7372	2.23707	0.173	0.00926993		14000	2100	152000	17000	225	29	268000	28000	374	36	31	6.5	12290	980	11.2	1.3	48.7	5	1310	140	747	88	6.21	0.48	16.9	2.3	4.11	0.47	21.7	3.9	8.77	0.89	3.34	0.87	8.5	1.6	1.55	0.34	10.4	1.3
30		0.2221	19.82		59.7372	1.86143	0.1655	0.00838129		14800	1800	152000	17000	153	24	289000	31000	363	60	33.2	1.8	12700	1700	11.3	1.1	46.1	2.7	1630	170	628	97	6.6	1	18.2	2.2	4.7	1.1	21.5	2.6	9.3	2.4	2.38	0.6	7.8	1.2	1.5	0.28	9.4	1.6
31		0.1779	19.72		61.6903	1.78789	0.1474	0.00966078		14400	1900	135000	17000	100	16	256000	25000	374	28	31.9	6.1	11700	1200	10.9	1.1	48.1	3.2	1510	160	386	47	6.15	0.68	18.3	1.7	4.2	0.47	19.8	1.7	6.8	1.5	2.43	0.74	7.3	1.7	1.54	0.25	10	1.5
32		0.2711	17.24		55.1572	1.83015	0.215	0.0108853		14760	940	143000	13000	159	24	284000	14000	375	14	33.2	5.4	12740	520	13.3	1.4	50.5	3.1	1596	95	580	54	6.6	0.4	21.3	3.1	5.29	0.75	28	2.1	8.5	1.6	2.77	0.18	7.84	0.86	1.97	0.34	9	1.7
33		0.3019	17.01		54.7046	1.66638	0.242	0.0120177		14300	1000	141000	11000	160	18	253000	30000	364	34	25.5	5.2	11900	1300	11.7	1.6	46.6	4.9	1940	250	1080	130	7.77	0.64	23.3	2	5.05	0.8	24.1	3.3	8.8	2.3	2.85	0.67	9.2	2.5	1.55	0.26	8.61	0.74
34		0.2153	19.06		63.4115	2.30947	0.1459	0.00927118		15700	1600	148000	19000	181	36	279000	40000	379	51	29.4	3.2	12200	1600	11.3	1.6	48.1	6.7	1800	200	980	130	7.2	1.2	24.3	3.9	5.75	0.73	34.8	3.8	9.74	0.82	3.19	0.57	9.7	2.3	1.67	0.39	9.8	2
35		0.2783	17.11		57.1102	2.04478	0.2022	0.00995811		14300	1900	151000	18000	158	27	264000	44000	386	47	28.3	3.8	11390	530	11.5	1.8	42.2	5.3	1750	220	1070	170	7.29	0.42	22.7	2.5	5.33	0.8	26.5	3.9	9.8	2.7	3.03	0.65	9.35	0.91	1.77	0.31	9.2	2.2
36		0.1947	15.96		58.2072	2.14003	0.2016	0.0106896		14400	1200	146000	19000	195	20	248000	23000	340	42	25.1	6.5	11480	610	12.5	2.3	52	3.3	1330	200	970	170	5.51	0.99	15.5	1.2	3.43	0.57	15.5	3.9	6.9	1.2	2.2	0.45	7.36	0.97	1.36	0.32	10.6	2.4
37		0.1582	16.68		57.7367	2.05518	0.1741	0.00890867		13500	1200	132000	11000	177	21	263000	17000	354	36	30.6	3.9	11600	1200	10.6	1.5	45.8	3.9	960	90	637	20	6.58	0.44	17.9	1.5	4.09	0.54	19.5	1.5	6	1.3	2.59	0.57	7.7	1.3	1.31	0.29	9.1	2.1
38		0.1847	17.7		59.3472	2.1237	0.1578	0.00953731		14300	1100	146000	10000	143	27	295000	13000	369	35	38.9	3.6	12200	1000	12	1.6	46.2	4	1490	150	346	13	7.31	0.8	19.7	1.5	4.32	0.76	24.6	4.2	8.6	2.1	2.19	0.45	8	1.1	1.28	0.24	9.1	1.9
39		0.2043	17.94		59.6303	1.80223	0.177	0.0115556		13600	1400	138000	9100	120	16	260000	22000	343	39	37.4	1.7	11600	490	11.5	1.1	44.6	2.6	1231	96	465	32	6.08	0.64	18.2	1.7	4.75	0.49	23.8	2.8	9.59	0.76	2.31	0.31	8.9	2.4	1.51	0.24	8.92	0.72
40		0.2052	18.47		63.0517	2.02952	0.156	0.00914846		14800	1200	144000	16000	144	27	275000	26000	348	12	28.2	4.3	12280	880	10.9	1.4	48.3	2.5	1490	120	364	44	6.8	0.9	20.4	1.2	4.32	0.24	23.1	2.2	6.5	1	2.22	0.33	8.1	2.5	1.72	0.27	9.3	2
41		0.2939	17.51		54.7645	2.08106	0.212	0.0117889		15500	1800	144000	8900	188	35	279000	19000	358	23	40.8	6.9	12200	1100	12.9	2.2	48.3	4.5	1810	210	583	46	8.97	0.77	24.6	2.8	5.48	0.43	29.3	2.8	10.5	1.5	2.85	0.67	8.4	1.2	1.65	0.19	10.1	1.8
42		0.815	21.09		36.7512	1.16583	0.4456	0.0126658		14100	1100	133000	18000	190	21	264000	18000	350	37	30.4	2	11200	1100	13.2	1.1	42.9	3.2	2260	160	1174	46	7.4	0.69	22.31	0.69	5.17	0.52	30	3.7	9.1	2.6	2.49	0.4	10.6	1.8	1.51	0.19	9.2	2.2
43		0.2341	17.47		57.4382	1.87717	0.206	0.0117463		15600	1600	149000	12000	152	20	286000	19000	370	29	33.7	5.8	12260	750	10.59	0.82	46.9	4.6	1360	110	367	40	6.94	0.76	20.6	1.3	4.5	0.32	22.95	0.83	7.3	2.4	2.67	0.53	9.3	2	1.39	0.21	8.66	0.53
44		0.1965	18.01		60.9756	2.13093	0.1563	0.00905659		15520	900	145000	7800	119	24	274000	27000	388	22	33.2	4.2	12520	590	12.2	1.2	50.8	2.7	1590	140	369	45	10.2	1	24.2	1.8	5.59	0.54	27.1	3.1	8.1	1.5	2.88	0.43	8	2.3	1.87	0.31	10.1	1.3
45		0.1734	16.86		59.7372	2.05923	0.159	0.0104934		14800	1200	143000	18000	146	19	286000	22000	396	28	32.8	4.2	12900	1100	11.1	1.7	49.9	4.5	1530	110	406	46	11	1.3	27.7	1.9	5.91	0.56	27	2.7	10.9	1	2.38	0.3	8.3	1.7	1.87	0.19	8.3	1
JC106, quartzite
1		0.2114	4.37		44.3262	2.76333	0.374	0.0176621		4860	140	128800	3600	692	18	552000	15000	902	27	146.9	6.1	11470	370	12.32	0.64	515	18	290.3	5.8	231	11	136.7	4.1	497	24	78.1	3.8	415	26	124	7.3	31.3	1.8	125.1	8.8	18.77	0.82	112.3	3.6
2		0.1695	4.56		55.6174	3.22816	0.247	0.0167453		4680	240	130700	5000	709	27	560000	23000	934	28	160.3	5.7	11710	400	10.74	0.5	530	12	308	11	248	14	143.3	3.6	525	20	80.4	2.1	435	14	133.9	5.5	32.7	1	134	3.7	20.91	0.82	119.3	7.2
3		0.2589	6.75		54.1125	2.97202	0.2484	0.00984536		6150	160	133300	3000	535	32	550000	27000	928	47	133.4	5.6	11210	640	14.06	0.87	701	34	490	18	393	21	218	12	782	39	122.5	7.1	657	24	184	14	43.5	2.2	183.4	9.8	26.9	1.5	152.8	7.1
4		0.3347	9.93		55.8036	2.98431	0.2313	0.00898275		6990	180	124100	2100	372	19	566000	9100	863	26	106.2	3.1	10670	390	15.49	0.79	806	23	608	16	363	18	283.2	7.8	1026	37	149.2	4.7	740	33	197.3	5.7	46.6	1.8	194.2	5.4	28.9	1.2	171.8	2.5
5		0.3037	9.46		58.6855	3.14668	0.2125	0.0107737		6610	260	128900	3600	394	11	562400	8000	1033	34	147.9	5.9	10680	240	13.85	0.62	771	30	608	21	582	21	262	8	925	31	137.5	5.2	708	26	192.6	6.9	46.8	1.9	195.8	7.5	28.3	1	169	8.5
6		0.2795	8.01		57.4713	3.20539	0.2229	0.00915826		6330	290	125700	5300	496	30	544000	30000	1006	33	151.4	5.1	10960	530	13.44	0.7	706	26	564	24	604	25	235	13	813	39	126.7	5.5	666	42	188	15	44.3	2.1	191	10	28.6	2.1	161	11
7		0.142	3.133		45.2489	2.99701	0.355	0.0193497		4810	200	128600	4200	669	25	557000	11000	906	35	157.3	2.9	11220	170	10.93	0.45	598.2	6.9	226.4	5.4	268	11	113.6	2.9	436	15	77.6	3.2	432	18	140	4.5	35.2	2.2	140.9	3.5	21.27	0.38	131.7	4.5
8		0.452	9.74		50.8647	3.4657	0.315	0.0287		7040	390	131400	8100	452	23	506000	17000	925	24	104.2	3	10310	460	15.23	0.88	773	46	676	30	469	23	295	13	978	35	142.8	7	741	32	190.5	5.3	45.8	1.9	182	5	26.8	1.2	163.9	8
9		0.3326	9.37		55.5864	2.99365	0.246	0.0129694		7630	320	131200	2800	367.7	5.3	531000	14000	751	19	89	2.7	9900	250	16.18	0.89	755	42	571	23	220.8	3.6	290	10	960	27	141.5	5.3	706	28	166.8	3.6	42.7	1.2	159.3	6.9	26.03	0.79	151.5	5.5
10		0.3072	9.02		55.6174	3.03127	0.2471	0.00974594		6740	300	134800	2400	421	24	542000	18000	1072	48	127.7	4.6	10290	140	14.48	0.52	779	35	683	33	775	40	279.4	4.9	1020	27	150.8	4.6	790	31	208.2	8.8	48.7	1.5	205	11	28.79	0.62	172.4	6.5
11		0.428	8.6		44.4444	4.02674	0.363	0.0426229		6530	300	132700	4400	422	17	507000	14000	933	38	108.8	4.3	9740	330	13.99	0.62	783	25	550.7	5.7	370	12	292.8	6.4	1005	29	151.9	4.9	758	17	199.6	7.7	47.8	2.4	187.3	6.5	28.8	1.9	166.3	5.7
12		0.3534	9.74		55.2486	2.97297	0.2347	0.0107761		6970	190	130100	5300	399	19	498000	21000	909	10	110	4.3	9710	310	14.85	0.51	778	17	600	34	290	15	297	11	1027	27	148.9	9	714	27	182.6	8.3	44	2.5	173.9	7.5	26.7	1.4	160.5	8.8
13		0.2392	9.59		57.4713	3.07334	0.1901	0.00660418		6850	260	125900	4300	267.9	9.7	469300	7000	1219	47	224.2	4.9	9830	390	14.58	0.82	729	29	666	21	894	38	240.5	8.2	852	41	125.9	3.1	690	28	185.3	6.7	45.1	1.4	187.6	7.6	27.6	1.4	154.5	8.1
14		0.1568	3.91		53.1915	3.51077	0.282	0.0160253		4490	130	126300	5900	700	28	455100	7800	866	16	143.8	6.1	11170	430	11.01	0.57	578	29	275.2	9.6	299	15	142.1	5.2	534	22	86.1	4.5	473	31	142.6	7.5	37.2	1.5	152.6	7.7	22.66	0.89	132.1	6.4
15		0.34	9.18		52.3286	3.07503	0.263	0.0197147		7170	260	127400	5600	412	21	439000	18000	1081	68	154.6	5.1	9570	640	15.9	1.3	742	59	572	15	506	30	269	11	964	43	138.4	8.1	689	22	174.1	5.6	45.2	1.3	182.3	8.3	26.9	0.52	149.3	7.8
16		0.95	b.d.		--	--	0.872	0.021		7630	240	126400	3500	234.8	8.2	401000	10000	621	14	107.9	3.7	7670	370	6.25	0.25	33.5	1.6	216.5	7.2	0.13	0.58	0.273	0.062	0.96	0.13	0.149	0.028	1.13	0.15	0.77	0.13	0.353	0.082	1.99	0.35	0.509	0.09	4.78	0.57
17		0.395	0.1		0.98	0.74	0.893	0.027		6480	190	131000	3200	220	15	392000	17000	687	23	104.2	3.5	7270	280	5.6	0.24	31.7	1.5	227.5	3.9	0.67	0.39	0.83	0.12	3.21	0.27	0.48	0.1	2.33	0.15	0.86	0.19	0.365	0.073	2.31	0.31	0.6	0.14	5.18	0.7
18		0.421	0.05		1.3	1.54	0.885	0.026		6260	190	122100	6300	222	14	370000	18000	611	29	80.1	4	6920	160	6.2	0.39	28.1	1.3	220	12	0.35	0.43	0.597	0.085	1.85	0.24	0.263	0.058	1.36	0.24	0.72	0.32	0.399	0.089	1.71	0.35	0.414	0.092	4.48	0.49
19		0.187	b.d.		--	--	0.871	0.026		7110	280	131000	3600	240	13	356000	17000	635	23	93.2	3.3	7320	180	6.98	0.47	47.9	1.7	192.2	4.6	0.43	0.29	4.11	0.2	13.83	0.58	2.17	0.18	12.38	0.96	4.8	0.6	1.24	0.13	6.27	0.3	1.23	0.14	8.46	0.58
20		0.1157	b.d.		--	--	0.88	0.036		7030	270	135800	4300	241	11	354300	9700	614	18	103.7	3.9	8270	290	6.57	0.34	43	1.7	197.6	4.6	0.21	0.44	2.45	0.3	8.41	0.83	1.46	0.18	8.5	0.94	3.45	0.36	0.93	0.2	5.42	0.73	0.91	0.17	7.11	0.79
21		0.124	b.d.		--	--	0.842	0.03		7340	340	126600	6900	272	17	336000	14000	568	18	87.1	5.6	7310	410	9.2	0.48	85.1	5	173.5	5.9	1.02	0.6	17.3	1.2	50.5	2.6	7.3	0.57	38.3	2.3	12.8	1.2	3.6	0.21	14.2	1.3	2.52	0.28	16.25	0.69
22		0.0871	b.d.		--	--	0.859	0.047		6180	160	128400	5100	203.9	7.8	331000	16000	665	40	102.1	6	6740	250	5.14	0.16	37	1.7	229.8	8	0.42	0.46	0.477	0.083	1.48	0.15	0.208	0.034	1.01	0.24	0.97	0.2	0.405	0.077	1.81	0.3	0.466	0.052	5.7	0.51
23		0.134	b.d.		--	--	0.883	0.031		7260	310	135200	5700	139.9	8.1	313000	12000	749	20	129.2	4.1	8050	260	4.66	0.42	31.6	1.8	209	12	0.96	0.88	1.36	0.19	4.09	0.3	0.53	0.11	2.58	0.27	0.96	0.33	0.504	0.089	2.1	0.46	0.475	0.075	4.73	0.61
24		0.1625	0.27		4.35	3.41	0.844	0.033		6860	280	130300	2800	418	22	193200	6500	569	12	73.6	4.7	7150	230	17.58	0.99	145.1	7.7	184.7	5.6	1.42	0.7	40.4	1.2	127.4	4.8	17.48	0.51	88.1	5.3	25.8	1.6	7.82	0.37	31.2	2	4.79	0.23	27.2	1.5
25		0.133	0.2		4.55	2.49	0.878	0.034		7450	400	133900	7300	282	16	197000	11000	602	29	87.6	3.8	6580	300	10.45	0.83	113.9	4.3	199	10	0.76	0.65	22.6	1.2	78	4.5	11.25	0.79	61.4	2.9	19.8	1.6	5.69	0.32	23.8	1.5	4.15	0.33	24.1	1.6
26		0.252	5.19		45.0451	3.17085	0.354	0.0269467		5130	200	132800	3300	774	25	179800	7600	931	26	198.9	8.7	9880	320	11.98	0.62	478	20	336	18	243	10	135.5	6.7	547	32	79.7	2.4	426	18	112.3	5.3	31.18	0.43	120.2	7.3	18.47	0.83	105	8.5
27		0.341	4.225		27.1739	2.98542	0.535	0.0404412		5593	93	133000	7700	641	38	187600	5400	936	37	220	12	10540	510	11.73	0.84	522	18	315	14	229	13	119.3	7.8	532	27	79.4	1.9	445	21	115.8	3.2	33.1	1.1	126.1	7.7	19.2	1.2	110.2	4.8
28		0.45	3.243		15.3846	3.63267	0.648	0.0497188		4647	66	129300	4400	665	26	182700	6300	899	45	109.8	3.5	9520	310	11.31	0.72	622	21	226.2	8.7	263.1	9.4	113.3	5.4	534	18	87.6	3	506	13	160.4	9.3	41.8	1.3	169.7	6.9	25.81	0.92	144.2	7.8
29		0.509	1.51		8.13008	1.44636	0.787	0.031253		4490	160	127500	3400	534	20	181000	6100	902	30	163.3	7.6	8430	390	11.14	0.98	786	26	229	13	367	16	87.9	3.9	539	26	100.7	4.1	636	24	210.8	7.8	49.7	2.4	226	11	34	1.3	186	11
30		0.372	3.82		23.0947	2.71163	0.591	0.0417099		4730	170	130900	2800	655	37	181900	5300	931	38	123.4	4	9250	270	11.6	0.66	526	23	243.2	5	211.4	8.7	126.8	4.3	548	16	84.7	4.7	469	24	127.3	6.2	36.9	2.1	131.9	5.7	20.08	0.95	117.8	6.5
31		0.272	4.78		38.4615	3.40558	0.438	0.0399717		4690	190	129600	2800	692	30	173300	7800	875	35	248.1	7.6	9270	230	12.66	0.64	481	13	313	17	259	12	135.8	3.7	565	16	82.3	2.6	433	23	118.1	4.5	33	1.2	124.5	5.3	18.8	1.1	109	5.5
32		0.262	4.367		35.5872	2.89184	0.437	0.0331721		4540	140	125400	4400	712	17	176000	4600	876	20	170.8	9.8	9360	300	12.28	0.85	492	12	282	16	235.3	8.6	128.2	5.7	548	15	80	2	416	14	118.5	6.1	32.99	0.89	120.3	5	19	0.9	100.4	2.3
33		0.399	3.675		20.79	3.32206	0.649	0.0401557		4860	250	122900	3000	668	25	177800	3000	909	28	170.7	2.5	9230	210	10.22	0.36	549.8	9.8	264.6	8	259.2	8.4	112.3	1.7	501	11	78	1.6	435.6	8	124.5	3.5	33.7	1.9	129.7	5.6	21.34	0.66	119.9	6.3
34		0.411	3.702		20.4082	3.32576	0.614	0.0437584		4570	210	131000	6200	695	24	186900	5500	914	27	100.9	4.4	8930	150	11.1	0.57	560	15	233.7	7.1	270	11	125.3	5	543	26	87	4.7	507	21	152	6.3	39.6	2	151	4	23.6	1.4	129.8	3.8
35		0.413	2.76		16.3399	1.43092	0.69	0.0218961		4550	180	132400	6200	641	25	201000	14000	890	44	104.9	4.3	9100	390	11.21	0.22	714	39	230	11	343	16	118.8	2.7	570	22	100.1	4.5	606	21	192.2	5.9	49.4	1.8	203.8	8.4	31.8	1.4	177.9	1.5
36		0.183	3.44		40.1606	4.36075	0.38	0.0377725		4420	130	133500	6200	698	31	204400	4500	880	42	90.2	3	9130	210	11.51	0.75	509	14	235	13	205.5	9.3	139.9	4	549.4	6.1	80.4	3.6	454	16	135.9	5.7	35.98	0.84	136	6.3	20.9	1.4	117	3.5
a All uncertainties are given as absolute error.
b Zr abundances for Zr-in-titanite thermometry calculated using TNT150 as primary RM.
c Colors match distinct isotopic and trace element populations identified in Figure 13.
d Includes propagated uncertainty on Zr abundance only.
e Includes propagated uncertainty on Zr abundance with an additional 2% temperature uncertainty added in quadrature.
[truncated: 80 more columns]
